# Supplementary material for: Proteomic Insights into Sulfur Metabolism in the Hydrogen-Producing Hyperthermophilic Archaeon Thermococcus onnurineus NA1
Source: MDPI journal article supplement (doi:10.3390/ijms16059167), 2015-04-23
Supplement: s1 [file s1]

## Supplementary Information

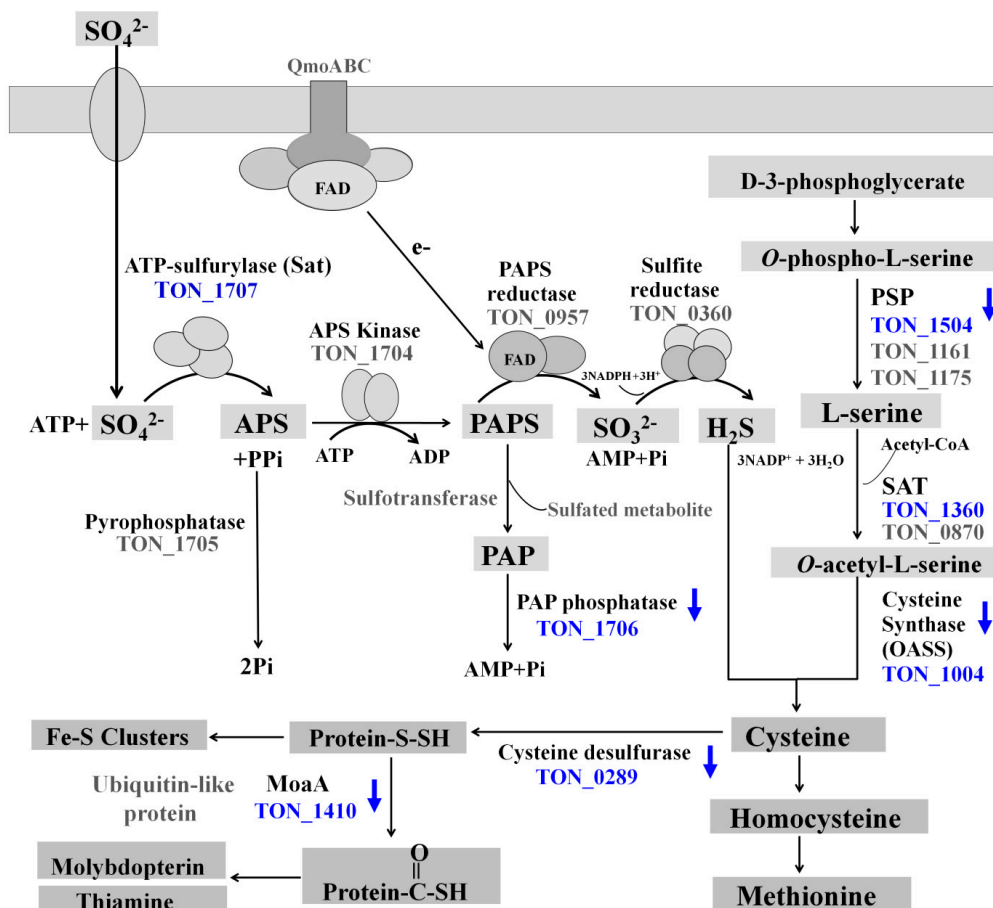

**Figure S1.** Proposed sulfur assimilation pathway in *Thermococcus onnurineus* NA1. Sulfate is transported into the cell and then reduced to sulfide. Sulfide then reacts with O-acetylserine to generate cysteine, which serves as the central sulfur donor for the biosynthesis of other sulfur compounds. For the biosynthesis of other sulfur compounds, cysteine donates sulfur to a conserved Cys residue of cysteine desulfurase to generate a persulfide group, which then functions as the proximal sulfur donor for the biosynthesis of Fe-S clusters. However, the sulfur-carrier protein(s) involved in the Fe-S cluster assembly have yet to be understood. For the biosynthesis of thiamine and molybdopterin, the persulfide group of cysteine desulfurase donates sulfur to the C-terminal Gly of ubiquitin-like proteins such as MoaA to generate a thiocarboxylate group. Enzymes down-regulated during growth on sulfur are indicated with blue arrows.
