# Supplementary material for: Proteomic Insights into Sulfur Metabolism in the Hydrogen-Producing Hyperthermophilic Archaeon Thermococcus onnurineus NA1
Source: Int J Mol Sci. 2015 Apr 23;16(5):9167–95. doi: 10.3390/ijms16059167 (PMC4463584; doi:10.3390/ijms16059167)
Supplement: Supplementary file 1 [file ijms-16-09167-s001.zip › ijms-77670-Supplementary Information-table.xlsx]

## Sheet: final data 
Supplementary Table S1
Protein identification results for the three comparisons of the T. onnurineus NA1 cells grown with CO versus Sulfur, Formate versus Sulfur, and Starch versus Sulfur.
Protein name	Gene ID	ratioa				p valueb
		Sulfur/ CO	Sulfur/ Formate	Sulfur/ Starch		Sulfur/ CO	Sulfur/ Formate	Sulfur/ Starch
Energy metabolism
Glycolysis and gluconeogenesis
ADP-dependent glucokinase (GLK)	TON_0246	-	-	S		-	-	S
Glucose-6-phosphate isomerase (PGI)	TON_0247	-	-	S		-	-	S
Phosphoenolpyruvate synthase (PPS)	TON_0311	1.77	1.68	0.96		1	1	0.11
Cofactor-independent phosphoglycerate mutase (PGM)	TON_0442	0.79	0.61	0.51		0.1	0	0
Glyceraldehyde-3-phosphate dehydrogenase (GAPDH)	TON_0639	1.3	0.52	Y		0.89	0	Y
2-Phosphoglycerate kinase (PGK)	TON_0742	-	F	-		-	F	-
Pyruvate kinase (PYK)	TON_0785	3.86	Y	2.16		0.99	Y	0.96
Fructose-bisphosphate aldolase (FBA)	TON_0903	0.73	0.38	0.04		0.17	0	0
ADP-specific phosphofructokinase (PFK)	TON_1012	-	-	S		-	-	S
Thermophile-specific fructose-1,6-bisphosphatase (FBPase)	TON_1497	2.77	1.6	Y		1	1	Y
Tungsten-containing glyceraldehyde-3-phosphate:ferredoxin oxidoreductase (GAPOR)	TON_1498	-	-	S		-	-	S
Phosphopyruvate hydratase (ENO)	TON_1613	1.21	1.09	0.71		1	0.97	0
Triosephosphate isomerase (TIM)	TON_1640	0.97	0.7	0.31		0.45	0	0
Pyruvate degradation
Glutamate dehydrogenase (GDH)	TON_0157	0.73	0.75	1.93		0	0	1
Alanine aminotransferase (AT)	TON_0231	0.99	0.84	1.08		0.42	0.12	0.66
Acetyl-CoA synthetase I (NDP forming), beta subunit (ACSⅠ_α)	TON_0327	0.82	0.63	0.8		0.01	0	0.01
Pyruvate formate-lyase activating enzyme-related protein, radical SAM family (PFL-AE)	TON_0415	-	-	S		-	-	S
Acetyl-CoA synthetase II (NDP forming), beta subunit (ACSⅡ_β)	TON_1002	0.37	0.34	0.47		0	0	0
Acetyl-CoA synthetase I (NDP forming), alpha subunit (ACSⅠ_α)	TON_1097	2.44	1.32	0.45		1	1	0
Acetyl-CoA synthetase II (NDP forming), alpha subunit (ACSⅡ_β)	TON_1313	0.83	0.64	1.19		0.04	0	0.91
Pyuvate ferredoxin oxidoreductase subunit delta (POR_δ)	TON_1480	C	-	-		C	-	-
Pyruvate ferredoxin oxidoreductase subunit alpha (POR_α)	TON_1481	0.61	0.9	0.63		0	0	0
Pyruvate ferredoxin oxidoreductase subunit beta (POR_β)	TON_1482	0.36	0.52	0.51		0	0	0
Hypothetical formate dehydrogenase, alpha subunit (Fdh2)	TON_1563	C	F	S		C	F	S
4Fe-4S cluster-binding protein	TON_1564	-	F	-		-	F	-
PFL-AE related proteins (Radical SAM superfamily)
Pyruvate formate-lyase activating enzyme-related protein, radical SAM family (PFL-AE)	TON_0415	-	-	S		-	-	S
Hypothetical UPF0069 protein	TON_1269	Y	1.06	Y		Y	0.48	Y
Cmo tungsten-containing aldehyde ferredoxin oxidoreductase cofactor modifying protein	TON_1353	Y	1.34	Y		Y	0.73	Y
Molybdenum cofactor biosynthesis protein A	TON_1410	-	F	S		-	F	S
Hypothetical protein TON_1520	TON_1520	0.52	0.38	0.22		0.01	0	0
Pentose phosphate pathway
Adenine phosphoribosyltransferase (APRT)	TON_0120	-	F	-		-	F	-
Ribose-5-phosphate isomerase A (RPI)	TON_0168	-	F	S		-	F	S
Phosphohexomutase	TON_0244	-	F	S		-	F	S
Bifunctional D-arabino 3-hexulose-6-phosphate formaldehyde lyase/phosphohexuloisomerase(HPS/PHI)	TON_0336	2.27	1	0.48		0.97	0.49	0
Thymidine phosphorylase (DeoA, AMP phosphorylase homolog)	TON_1062	0.82	0.8	1.82		0.01	0	1
Ribulose bisophosphate carboxylase (RuBisCO) typeIII	TON_1234	1.12	1.28	1.32		0.96	1	1
Translation initiation factor IF-2B subunit delta (RBPI Homolog)	TON_1296	1.3	1.63	0.91		1	1	0.16
Ribose-phosphate pyrophosphokinase (PRPPS)	TON_1403	-	-	S		-	-	S
carbohydrate/pyrimidine kinase	TON_1488	Y	Y	Y		Y	Y	Y
Deoxyribose-phosphate aldolase	TON_1608	1.2	Y	0.57		0.68	Y	0.01
Phosphopentomutase	TON_1789	Y	0.83	0.68		Y	0.31	0.13
TCA (CO2 fixation)
Phosphoenolpyruvate carboxykinase (PCK)	TON_0192	0.9	1.13	2.16		0.26	0.8	1
2-Oxoglutarate ferredoxin oxidoreductase subunit beta (KGOR_β)	TON_0583	0.88	Y	1.42		0.27	Y	0.89
2-Oxoglutarate ferredoxin oxidoreductase subunit alpha (KGOR_α)	TON_0584	0.97	Y	Y		0.41	Y	Y
2-Oxoglutarate ferredoxin oxidoreductase subunit beta (KGOR_β)	TON_0586	Y	Y	1.58		Y	Y	0.69
2-Oxoglutarate ferredoxin oxidoreductase subunit alpha (KGOR_α)	TON_0587	C	-	-		C	-	-
Pyruvate carboxylase subunit B (PC)	TON_0904	C	-	S		C	-	S
Ribulose bisophosphate carboxylase (RuBisCO) typeIII	TON_1234	1.12	1.28	1.32		0.96	1	1
Pyuvate ferredoxin oxidoreductase subunit delta (POR_δ)	TON_1480	C	-	-		C	-	-
Pyruvate ferredoxin oxidoreductase subunit alpha (POR_α)	TON_1481	0.61	0.9	0.63		0	0	0
Pyruvate ferredoxin oxidoreductase subunit beta (POR_β)	TON_1482	0.36	0.52	0.51		0	0	0
Archaeal succinyl-CoA synthetase (NDP forming), large subunit (SCS)	TON_1665	2.51	2.1	1.84		1	1	1
Propanoate metabolism
Methylmalonyl-CoA decarboxylase, alpha subunit (Pcc)	TON_0041	0.47	0.81	0.7		0.02	0.26	0.11
Acetyl-CoA synthetase I (NDP forming), beta subunit (ACSⅠ_β)	TON_0327	0.82	0.63	0.8		0.01	0	0.01
Methylmalonyl-CoA epimerase (Mpi)	TON_1074	-	-	S		-	-	S
Hypothetical methylmalony-CoA mutase (MutⅠ)	TON_1076	-	F	-		-	F	-
Acetyl-CoA synthetase I (NDP forming), alpha subunit (ACSⅠ_α)	TON_1097	2.44	1.32	0.45		1	1	0
Methylmalonyl-CoA mutase, N-terminus of large subunit (MutⅡ)	TON_1110	-	-	S		-	-	S
Amino acid degradation
Probable serine-glyoxylate aminotransferase, class V	TON_0061	2.56	2.01	3.71		1	1	1
Glutamate dehydrogenase (GDH)	TON_0157	0.73	0.75	1.93		0	0	1
Alanine aminotransferase (AT)	TON_0231	0.99	0.84	1.08		0.42	0.12	0.66
Acetyl-CoA synthetase I (NDP forming), beta subunit (ACSⅠ_β)	TON_0327	0.82	0.63	0.8		0.01	0	0.01
Aspartate aminotransferase	TON_0565	0.71	0.63	Y		0.05	0.02	Y
2-Oxoglutarate ferredoxin oxidoreductase subunit beta (KGOR_β)	TON_0583	0.88	Y	1.42		0.27	Y	0.89
2-Oxoglutarate ferredoxin oxidoreductase subunit alpha (KGOR_α)	TON_0584	0.97	Y	Y		0.41	Y	Y
2-Oxoglutarate ferredoxin oxidoreductase subunit beta (KGOR_β)	TON_0586	Y	Y	1.58		Y	Y	0.69
2-Oxoglutarate ferredoxin oxidoreductase subunit alpha (KGOR_α)	TON_0587	C	-	-		C	-	-
Hypothetical glutamine amidotransferase	TON_0739	Y	Y	0.73		Y	Y	0.4
N-acetyltransferase	TON_0874	C	-	S		C	-	S
Acetyl-CoA synthetase II (NDP forming), beta subunit (ACSⅡ_β)	TON_1002	0.37	0.34	0.47		0	0	0
Acetyl-CoA synthetase I (NDP forming), alpha subunit (ACSⅠ_α)	TON_1097	2.44	1.32	0.45		1	1	0
Hypothetical UPF0069 protein	TON_1269	Y	1.06	Y		Y	0.48	Y
Multiple substrate aminotransferase	TON_1295	0.21	0.38	0.46		0	0	0
Hypothetical protein TON_1301	TON_1301	0.66	0.95	1.25		0	0.25	1
Acetyl-CoA acetyltransferase	TON_1302	0.63	0.82	1.27		0	0.01	1
Indolepyruvate oxidoreductase subunit beta (IOR_β)	TON_1311	0.66	0.7	1.22		0	0	0.98
Indolepyruvate: ferredoxin oxidoreductase, alpha subunit (IOR_α)	TON_1312	0.77	0.64	1.27		0	0	1
Acetyl-CoA synthetase II (NDP forming), alpha subunit (ACSⅡ_α)	TON_1313	0.83	0.64	1.19		0.04	0	0.91
2-Ketoisovalerate ferredoxin oxidoreductase subunit delta (VOR_δ)	TON_1477	C	-	S		C	-	S
2-Ketoisovalerate ferredoxin oxidoreductase subunit alpha (VOR_α)	TON_1478	0.49	0.68	0.64		0	0	0
2-Ketoisovalerate ferredoxin oxidoreductase subunit beta (VOR_β)	TON_1479	0.33	0.48	0.45		0	0	0
Pyuvate ferredoxin oxidoreductase subunit delta (POR_δ)	TON_1480	C	-	-		C	-	-
Pyruvate ferredoxin oxidoreductase subunit alpha (POR_α)	TON_1481	0.61	0.9	0.63		0	0	0
Pyruvate ferredoxin oxidoreductase subunit beta (POR_β)	TON_1482	0.36	0.52	0.51		0	0	0
4-Aminobutyrate aminotransferase	TON_1605	Y	4.35	14.15		Y	1	1
Archaeal succinyl-CoA synthetase (NDP forming), large subunit (SCS)	TON_1665	2.51	2.1	1.84		1	1	1
Diaminopimelate aminotransferase	TON_1785	2.2	1.32	Y		0.97	0.87	Y
Aldehyde metabolism
Alcohol dehydrogenase (ADH)	TON_0544	C	-	S		C	-	S
Fe-containing alcohol dehydrogenase (Fe-ADH)	TON_0936	1.32	1.34	1.51		0.96	0.79	1
Formaldehyde:ferredoxin oxidoreductase (FOR)	TON_0749	C	-	-		C	-	-
2-Oxoacid:ferredoxin oxidoreductase, alpha subunit (OFOR_α)	TON_0860	C	F	S		C	F	S
2-Oxoacid ferredoxin oxidoreductase subunit beta (OFOR_β)	TON_0861	C	F	S		C	F	S
Aor-2 tungsten-containing aldehyde ferredoxin oxidoreductase (AOR)	TON_1354	0.23	2.03	1.09		0	1	0.99
Formate dependent hydrogenase and hydrogenase maturation system
ATPase involved in chromosome partitioning	TON_0262	0.78	0.53	0.47		0.07	0	0
Hydrogenase maturation protease HycI	TON_0263	-	F	-		-	F	-
Hydrogenase 4, component I or formate hydrogen lyase, subunit 7 (MhyⅠ)	TON_0274	-	-	S		-	-	S
Hydrogenase 4, component G or formate hydrogen lyase, subunit 5 (MhyⅠ)	TON_0276	1.73	Y	2.94		0.94	Y	0.94
Oxidoreductase iron-sulfur protein	TON_0280	Y	Y	Y		Y	Y	Y
fdhA formate dehydrogenase, alpha subunit	TON_0281	Y	Y	Y		Y	Y	Y
Hydrogenase maturation protein HypF	TON_0286	0.26	0.41	0.18		0.01	0.06	0
Hydrogenase expression/formation protein HypE	TON_0287	0.69	0.86	0.45		0.16	0.41	0
Cysteine desulfurase	TON_0289	C	F	S		C	F	S
Coenzyme F420 hydrogenase alpha subunit (Frh_α)	TON_1559	-	F	S		-	F	S
Coenzyme F420 hydrogenase/dehydrogenase beta subunit (Frh_β)	TON_1561	-	F	S		-	F	S
TonB-dependent receptor protein:Formate dehydrogenase, subunit FdhD	TON_1562	-	F	-		-	F	-
Hypothetical formate dehydrogenase, alpha subunit (Fdh2)	TON_1563	C	F	S		C	F	S
4Fe-4S cluster-binding protein	TON_1564	-	F	-		-	F	-
Hydrogenase 4, component G or formate hydrogen lyase, subunit 5 (MhyⅡ)	TON_1569	-	F	-		-	F	-
Formate hydrogen lyase subunit 6 (hydrogenase 3 component F) (MhyⅡ)	TON_1570	-	F	-		-	F	-
Hydrogenase 4, component I or formate hydrogen lyase, subunit 7 (MhyⅡ)	TON_1571	-	F	-		-	F	-
Hypothetical protein TON_1572	TON_1572	-	F	-		-	F	-
Hypothetical Multisubunit Na+/H+ antiporter MnhB subunit (MnhB)	TON_1577	-	F	-		-	F	-
CO-responsive hydrogenase and other membrane bound hydrogenases
NADH dehydrogenase subunit D (Mbx)	TON_0487	2.48	Y	1.75		1	Y	0.97
NADH dehydrogenase subunit C (Mbx)	TON_0488	C	-	-		C	-	-
Cytosolic NiFe-hydrogenase, alpha subunit	TON_0534	0.32	-	0.57		0	-	0.11
Cytosolic NiFe-hydrogenase, delta subunit	TON_0535	C	-	-		C	-	-
Cytochrome-c3 hydrogenase subunit gamma	TON_0536	C	-	-		C	-	-
Sulfhydrogenase beta subunit	TON_0537	C	-	-		C	-	-
Hypothetical formate dehydrogenase, alpha subunit	TON_0539	C	-	-		C	-	-
Oxidoreductase iron-sulfur protein	TON_0540	C	-	-		C	-	-
Putative glutamate synthase subunit beta	TON_0542	C	-	-		C	-	-
4Fe-4S cluster-binding protein	TON_0543	C	-	-		C	-	-
Alcohol dehydrogenase (ADH)	TON_0544	C	-	S		C	-	S
4Fe-4S ferredoxin, iron-sulfur binding domain protein (CooF)	TON_1017	C	-	-		C	-	-
Carbon-monoxide dehydrogenase, catalytic subunit (CooS)	TON_1018	0.01	Y	1.12		0	Y	0.61
Hypothetical ATP-binding protein (CooC)	TON_1019	C	-	-		C	-	-
Hydrogenase 4, subunit 5 (Mch)	TON_1023	C	-	-		C	-	-
NADH dehydrogenase (ubiquinone), 20 kDa subunit (Mch)	TON_1024	C	-	-		C	-	-
Membrane bound hydrogenase, NiFe-hydrogenase large subunit 2 (Mbh)	TON_1593	C	-	S		C	-	S
Respiration and electron transport
Cytochrome-c3 hydrogenase subunit gamma	TON_0054	-	-	S		-	-	S
Ferredoxin-NADP(+) reductase subunit alpha (FNR)	TON_0056	-	-	S		-	-	S
NADH:polysulfide oxidoreductase (NPSOR)	TON_0129	1.36	1.17	1.7		0.89	0.75	0.99
Hydrogenase 4, component G or formate hydrogen lyase, subunit 5	TON_0276	1.73	Y	2.94		0.94	Y	0.94
Oxidoreductase iron-sulfur protein	TON_0280	Y	Y	Y		Y	Y	Y
Protein disulfide oxidoreductase	TON_0319	2.53	3.06	1.4		1	1	1
tungsten-containing oxidoreductase	TON_0444	Y	Y	Y		Y	Y	Y
NADH dehydrogenase subunit D	TON_0487	2.48	Y	1.75		1	Y	0.97
NADH dehydrogenase subunit C	TON_0488	C	-	-		C	-	-
Cytosolic NiFe-hydrogenase, alpha subunit	TON_0534	0.32	-	0.57		0	-	0.11
Cytosolic NiFe-hydrogenase, delta subunit	TON_0535	C	-	-		C	-	-
Cytochrome-c3 hydrogenase subunit gamma	TON_0536	C	-	-		C	-	-
Hypothetical formate dehydrogenase, alpha subunit	TON_0539	C	-	-		C	-	-
Oxidoreductase iron-sulfur protein	TON_0540	C	-	-		C	-	-
Putative glutamate synthase subunit beta (beta chain-related oxidoreductase)	TON_0542	C	-	-		C	-	-
4Fe-4S cluster-binding protein	TON_0543	C	-	-		C	-	-
Alcohol dehydrogenase	TON_0544	C	-	S		C	-	S
D-isomer specific 2-hydroxyacid dehydrogenase	TON_0569	1.77	1.72	1.34		0.99	1	0.92
Molybdopterin oxidoreductase, molybdopterin-binding subunit	TON_0828	-	F	-		-	F	-
Type A flavoprotein	TON_0863	0.36	0.41	0.46		0	0	0
Rubrerythrin	TON_0866	0.34	0.48	0.7		0	0	0
iron-molybdenum cofactor-binding protein	TON_0919	Y	Y	Y		Y	Y	Y
iron-molybdenum cofactor-binding protein	TON_0921	Y	Y	Y		Y	Y	Y
Fe-containing alcohol dehydrogenase	TON_0936	1.32	1.34	1.51		0.96	0.79	1
4Fe-4S ferredoxin, iron-sulfur binding domain protein	TON_1017	C	-	-		C	-	-
Hydrogenase 4, subunit 5	TON_1023	C	-	-		C	-	-
NADH dehydrogenase (ubiquinone), 20 kDa subunit	TON_1024	C	-	-		C	-	-
NADH oxidase	TON_1271	1.48	Y	Y		0.88	Y	Y
putative oxidoreductase	TON_1336	Y	Y	Y		Y	Y	Y
Putative oxidoreductase	TON_1376	C	-	-		C	-	-
Hypothetical oxidoreductase	TON_1501	Y	1.28	1.28		Y	0.66	0.69
UbiE ubiquinone/menaquinone biosynthesis methyltransferase	TON_1509	C	-	-		C	-	-
Coenzyme F420 hydrogenase alpha subunit	TON_1559	-	F	S		-	F	S
Coenzyme F420 hydrogenase/dehydrogenase beta subunit	TON_1561	-	F	S		-	F	S
Hypothetical formate dehydrogenase, alpha subunit	TON_1563	C	F	S		C	F	S
4Fe-4S cluster-binding protein	TON_1564	-	F	-		-	F	-
Hydrogenase 4, component G or formate hydrogen lyase, subunit 5	TON_1569	-	F	-		-	F	-
Membrane bound hydrogenase, NiFe-hydrogenase large subunit 2	TON_1593	C	-	S		C	-	S
ATP-proton motive force interconversion
V-type ATP synthase subunit E	TON_1749	Y	1.3	1.35		Y	0.65	0.77
V-type ATP synthase subunit C	TON_1750	Y	Y	1.36		Y	Y	0.69
V-type ATP synthase subunit F	TON_1751	Y	Y	Y		Y	Y	Y
V-type ATP synthase subunit A	TON_1752	2.12	1.57	1.79		1	1	1
V-type ATP synthase subunit B	TON_1753	2.66	1.58	1.88		1	1	1
V-type ATP synthase subunit D	TON_1754	Y	Y	Y		Y	Y	Y
Others
Inorganic pyrophosphatase	TON_1914	1.21	1.27	0.82		0.78	0.9	0.12
Stress response
Antioxidant system and enzyemes (Oxygen detoxification)
Cytochrome-c3 hydrogenase subunit gamma (SHII)	TON_0054	-	-	S		-	-	S
NADH oxidase	TON_0204	-	F	-		-	F	-
NADH oxidase	TON_0305	Y	3	2.39		Y	1	1
Cytosolic NiFe-hydrogenase, alpha subunit	TON_0534	0.32	-	0.57		0	-	0.11
Cytosolic NiFe-hydrogenase, delta subunit	TON_0535	C	-	-		C	-	-
Cytochrome-c3 hydrogenase subunit gamma	TON_0536	C	-	-		C	-	-
Sulfhydrogenase beta subunit	TON_0537	C	-	-		C	-	-
Hypothetical peroxiredoxin, bacterioferritin comigratory protein	TON_0786	2.61	0.58	0.53		1	0	0
Peroxiredoxin	TON_0829	0.17	0.08	0.16		0	0	0
Alkyl hydroperoxide reductase subunit c	TON_0847	C	F	S		C	F	S
Thioredoxin peroxidase	TON_0862	C	-	S		C	-	S
Type A flavoprotein	TON_0863	0.36	0.41	0.46		0	0	0
NAD(P)H:rubredoxin oxidoreductase (NROR)	TON_0865	C	-	S		C	-	S
Rubrerythrin	TON_0866	0.34	0.48	0.7		0	0	0
Sor superoxide reductase	TON_0868	-	0.32	-		-	0	-
NADH oxidase	TON_1271	1.48	Y	Y		0.88	Y	Y
Hypothetical stress-inducible protein	TON_1292	-	F	-		-	F	-
Protein fate
protein and peptide degradation (Proteolytic pathways)
Proteasome subunit alpha	TON_0027	1.04	0.77	0.71		0.55	0.05	0.08
Bifunctional carboxypeptidase/aminoacylase	TON_0348	4.26	2.2	Y		1	0.93	Y
methionine aminopeptidase	TON_0362	Y	Y	Y		Y	Y	Y
Deblocking aminopeptidase (TET-3 homolog)	TON_0369	1.55	1.52	1.65		1	1	1
PepQ-1 X-pro dipeptidase	TON_0481	4.39	3.56	0.76		1	1	0
ATP-dependent protease Lon	TON_0529	Y	Y	Y		Y	Y	Y
Hypothetical endoglucanase (TET-1 homolg)	TON_0570	1.38	1.17	1.15		0.93	0.72	0.72
Prolyl endopeptidase	TON_0611	Y	Y	1.6		Y	Y	0.88
Xaa-Pro aminopeptidase	TON_0651	2.86	2.41	1.68		0.95	0.85	0.81
Zinc-dependent protease	TON_0672	C	-	S		C	-	S
Zinc-dependent protease	TON_0804	Y	Y	0.58		Y	Y	0.23
zinc-dependent protease	TON_0805	Y	Y	1.3		Y	Y	0.57
Hypothetical membrane protease subunit	TON_0958	-	-	S		-	-	S
acylamino acid-releasing enzyme (acylaminoacyl-peptidase)	TON_0969	Y	Y	Y		Y	Y	Y
Deblocking aminopeptidase (TET-2 homolog)	TON_1032	2.83	2.23	1.75		1	1	1
Hypothetical membrane protease subunit	TON_1058	0.49	0.9	0.3		0	0.38	0
D-aminopeptidase	TON_1067	Y	Y	Y		Y	Y	Y
Intracellular protease I (Pfp1)	TON_1285	Y	Y	1.55		Y	Y	0.99
proteasome-activating nucleotidase (PAN)	TON_1385	Y	Y	Y		Y	Y	Y
Proteasome, beta subunit 2	TON_1426	-	F	S		-	F	S
Acylamino acid-releasing enzyme (acylaminoacyl-peptidase)	TON_1543	5.87	Y	Y		1	Y	Y
Carboxypeptidase (Cobalt-activating carboxypeptidase, M32 family)	TON_1687	26.05	8.33	3.22		1	1	1
Pyrrolidone-carboxylate peptidase	TON_1690	C	-	-		C	-	-
D-aminopeptidase	TON_1960	Y	Y	Y		Y	Y	Y
Protein and peptide secretion and trafficking (Protein export)
signal recognition particle protein Srp54	TON_0123	Y	Y	Y		Y	Y	Y
Signal recognition particle GTPase	TON_0592	Y	Y	1.42		Y	Y	0.77
Type II/IV secretion system ATPase (intein)	TON_1675	0.36	0.84	0.94		0.1	0.42	0.46
preprotein translocase subunit SecD	TON_1744	Y	Y	Y		Y	Y	Y
Protein folding and stabilization
FKBP-type peptidyl-prolyl cis-trans isomerase (PPI ase)	TON_0603	0.23	0.74	0.54		0	0.25	0.03
Chaperonin, alpha subunit (Thermosome, alpha subunit)	TON_0707	1.38	0.96	0.89		1	0.21	0.01
prefoldin subunit alpha	TON_0914	Y	Y	Y		Y	Y	Y
Chaperonin beta subunit (Thermosome, beta subunit)	TON_1877	2.83	0.89	0.96		1	0.03	0.17
Protein modification and repair
Hydrogenase maturation protease HycI	TON_0263	-	F	-		-	F	-
Hydrogenase maturation protein HypF	TON_0286	0.26	0.41	0.18		0.01	0.06	0
Hydrogenase expression/formation protein HypE	TON_0287	0.69	0.86	0.45		0.16	0.41	0
Protein disulfide oxidoreductase (Pdo)	TON_0319	2.53	3.06	1.4		1	1	1
Pyruvate formate-lyase activating enzyme-related protein	TON_0415	-	-	S		-	-	S
Thioredoxin reductase	TON_1603	Y	6.17	0.5		Y	1	0
Sulfur metabolism and sulfur responsive proteins
Cytochrome-c3 hydrogenase subunit gamma (SHⅡ)	TON_0054	-	-	S		-	-	S
Ferredoxin-NADP(+) reductase subunit alpha (FNOR)	TON_0056	-	-	S		-	-	S
Cytosolic NiFe-hydrogenase, alpha subunit (SHⅠ)	TON_0534	0.32	-	0.57		0	-	0.11
Cytosolic NiFe-hydrogenase, delta subunit (SHⅠ)	TON_0535	C	-	-		C	-	-
Cytochrome-c3 hydrogenase subunit gamma (SHⅠ)	TON_0536	C	-	-		C	-	-
Sulfhydrogenase beta subunit (SHⅠβ)	TON_0537	C	-	-		C	-	-
Cysteine synthase	TON_1004	-	-	S		-	-	S
Hypothetical transcription regulator (SurR)	TON_0318	-	-	S		-	-	S
gltB-1 glutamate synthase small chain (SuDHⅠ, SudA)	TON_0057	Y	Y	Y		Y	Y	Y
NADH:polysulfide oxidoreductase (NPSOR)	TON_0129	1.36	1.17	1.7		0.89	0.75	0.99
NADH oxidase (NSR)	TON_0305	Y	3	2.39		Y	1	1
Protein disulfide oxidoreductase (Pdo)	TON_0319	2.53	3.06	1.4		1	1	1
Transcription regulator (ArSR)	TON_0525	0.79	0.36	Y		0.31	0	Y
ATPase C-terminus (SipB homolog)	TON_0916	Y	Y	Y		Y	Y	Y
iron-molybdenum cofactor-binding protein (SipA)	TON_0919	Y	Y	Y		Y	Y	Y
putative oxidoreductase (SuDHⅡ, SudX)	TON_1336	Y	Y	Y		Y	Y	Y
ferredoxin-NADP(+) reductase subunit alpha (SuDHII, SudY)	TON_1337	Y	Y	Y		Y	Y	Y
Sulfate adenylyltransferase	TON_1707	0.39	Y	Y		0.16	Y	Y
Fe-S cluster biogenesis
Cysteine desulfurase	TON_0289	C	F	S		C	F	S
ABC-type transport system involved in Fe-S cluster assembly, ATPase component	TON_0530	Y	0.92	0.85		Y	0.4	0.41
ABC-type transport system involved in Fe-S cluster assembly, permease component	TON_0531	0.74	0.84	Y		0.27	0.35	Y
Hypothetical protein TON_0849	TON_0849	4.26	2.29	0.37		1	1	0
Hypothetical protein TON_0850	TON_0850	Y	Y	0.38		Y	Y	0
ATPase	TON_1483	4.9	4.06	1.14		1	1	0.96
Nitrogen metabolism
Glutamate dehydrogenase (GDH)	TON_0157	0.73	0.75	1.93		0	0	1
Putative glutamate synthase subunit beta	TON_0542	C	-	-		C	-	-
Putative oxidoreductase	TON_1376	C	-	-		C	-	-
Glycine cleavage system aminomethyltransferase T	TON_1494	1.34	1.36	1.55		0.93	0.92	0.99
NAD synthetase	TON_1770	Y	Y	Y		Y	Y	Y
GlnA glutamine synthetase	TON_1772	C	-	S		C	-	S
Cell envelope
Lipid metabolism
mevalonate kinase	TON_0133	Y	Y	Y		Y	Y	Y
Geranylgeranyl hydrogenase	TON_0316	1.51	1.92	0.81		1	1	0.03
3-Hydroxy-3-methylglutaryl-CoA reductase	TON_0399	1.04	0.7	0.75		0.47	0.21	0.3
Geranylgeranylglyceryl phosphate synthase-like protein	TON_1065	-	F	-		-	F	-
Hypothetical protein TON_1301	TON_1301	0.66	0.95	1.25		0	0.25	1
Acetyl-CoA acetyltransferase	TON_1302	0.63	0.82	1.27		0	0.01	1
Surface polysaccharides and protein glycosylation
Phosphohexomutase	TON_0244	-	F	S		-	F	S
Bifunctional mannose-6-phosphate isomerase/mannose-1-phosphate guanylyl transferase	TON_0245	1.55	Y	0.68		0.63	Y	0.29
Sugar-phosphate nucleotydyltransferase	TON_0359	-	-	S		-	-	S
UDP-N-acetylglucosamine 2-epimerase	TON_0501	Y	Y	1.17		Y	Y	0.58
UDP-N-acetyl-D-mannosaminuronate dehydrogenase	TON_0502	1.9	1.93	1.45		0.98	1	1
Sugar-phosphate nucleotidyltransferase	TON_0659	0.24	0.21	0.47		0	0	0.01
Glucosamine--fructose-6-phosphate aminotransferase	TON_0774	0.99	0.65	1.02		0.43	0	0.58
UDP-glucose 4-epimerase	TON_0912	-	-	S		-	-	S
Glycosyltransferase	TON_1085	C	-	-		C	-	-
GalE-2 UDP-glucose 4-epimerase	TON_1836	Y	0.59	0.89		Y	0.04	0.35
Surface structure
S-layer protein precursor	TON_0413	-	-	S		-	-	S
Channel and Transporters
Anions
Hypothetical phosphate transport system regulator PhoU (Pst)	TON_1464	1.34	1.2	1.46		0.97	0.88	0.99
Hypothetical phosphate transport system regulator PhoU (Pst)	TON_1551	Y	0.44	Y		Y	0.04	Y
Cations
ABC transporter tungsten-binding protein (Tungsten)	TON_0014	Y	1.51	1.22		Y	0.88	0.79
ABC-type cobalt transport system, ATPase component (CbiOQ)	TON_0243	-	F	-		-	F	-
ABC-type iron(III)-siderophore transport system, periplasmic component (FepBCD)	TON_0296	-	F	-		-	F	-
small-conductance mechanosensitive channel	TON_0799	Y	Y	Y		Y	Y	Y
Hypothetical ATP-dependent transporter	TON_0851	4.66	1.84	0.2		1	1	0
ABC-type iron(III) transport system, periplasmic component (FbpABC)	TON_0983	1.35	1.75	0.44		0.99	1	0
ABC-type iron(III) transport system, ATPase component (FbpABC)	TON_0985	1.11	1.13	-		0.61	0.57	-
NhaC-type sodium/hydrogen antiporter (NhaC)	TON_1517	-	-	S		-	-	S
Hypothetical Multisubunit Na+/H+ antiporter MnhB subunit (MnhB)	TON_1577	-	F	-		-	F	-
Trk-type pottasium transport system, NAD-binding component	TON_1745	Y	Y	Y		Y	Y	Y
Carbohydrates and organic compounds
TRAP-type transporter	TON_0174	-	-	S		-	-	S
Hypothetical vitamin B12 transport protein precursor (VitB12)	TON_0546	Y	Y	1.08		Y	Y	0.52
ABC-type maltdextrin transport system, ATPase component (MalEFGK)	TON_1791	-	-	S		-	-	S
ABC-type maltodextrin transport system (MalEFGK)	TON_1795	0.88	Y	0.06		0.38	Y	0
Hypothetical vitamin B12 transport protein precursor (VitB12)	TON_1872	C	F	S		C	F	S
Peptides and amino acids
Branched-chain amino acid ABC transporter, periplasmic binding protein (braC-4)	TON_0162	-	-	S		-	-	S
ABC-type dipeptide/oligopeptide transport system (AppABC/OppBCDF)	TON_1764	8.5	5.21	3.32		1	1	1
ABC-type dipeptide/oligopeptide transport system, ATPase component	TON_1767	Y	Y	2.29		Y	Y	0.92
ABC-type dipeptide/oligopeptide transport system, ATPase component (AppABC/OppBCDF)	TON_1768	4.06	2.64	3.71		0.99	0.99	1
General
ABC-type transport system involved in Fe-S cluster assembly, ATPase component	TON_0530	Y	0.92	0.85		Y	0.4	0.41
ABC-type transport system involved in Fe-S cluster assembly, permease component	TON_0531	0.74	0.84	Y		0.27	0.35	Y
Sugar binding protein	TON_0594	0.51	1.09	0.26		0	0.76	0
ABC-type transport system, ATPase component	TON_0595	C	-	S		C	-	S
ABC-type transporter, ATPase component	TON_0606	C	F	S		C	F	S
ABC transporter related ATPase component	TON_1874	Y	Y	Y		Y	Y	Y
DNA metabolism
Chrmosome-associated proteins
Archaeal histone A	TON_0185	0.49	0.68	Y		0	0.03	Y
Hypothetical histone acetyltransferase Elp3	TON_1733	Y	Y	Y		Y	Y	Y
Replication
Hypothetical cell division control protein	TON_0043	-	F	-		-	F	-
DNA primase	TON_0188	0.58	0.76	0.68		0.01	0.1	0.02
Reverse gyrase	TON_0331	-	F	-		-	F	-
Hypothetical AP endonuclease	TON_0382	0.92	0.7	0.76		0.43	0.11	0.1
DNA topoisomerase VI subunit B	TON_0764	C	F	S		C	F	S
DNA polymerase sliding clamp (PCNA homolog)	TON_0826	1.09	0.96	0.8		0.71	0.41	0.09
Predicted type II restriction endonuclease	TON_0989	-	F	-		-	F	-
ATPase involved in DNA replication	TON_1414	1.36	1.38	1.11		0.95	0.92	0.73
Putative DNA-binding/iron metalloprotein/AP endonuclease	TON_1634	-	F	-		-	F	-
DNA polymerase II large subunit	TON_1642	Y	0.76	0.88		Y	0.32	0.36
DNA primase small subunit	TON_1777	-	F	-		-	F	-
Replication factor A complex, RPA32 subunit	TON_1952	C	-	-		C	-	-
Replication factor A	TON_1954	0.82	0.49	0.55		0.28	0	0
Recombination and repair
SS DNA-specific exonuclease	TON_0518	-	F	-		-	F	-
MutS-like DNA mismatch repair ATPase	TON_0711	-	F	-		-	F	-
Large helicase-related protein	TON_0937	-	F	-		-	F	-
hypothetical protein TON_1000	TON_1000	Y	Y	Y		Y	Y	Y
ERCC2/XPD/Rad3-related DNA repair helicase	TON_1040	-	-	S		-	-	S
UvrD/REP helicase	TON_1380	Y	Y	Y		Y	Y	Y
Bipolar DNA helicase	TON_1420	Y	0.91	1.16		Y	0.33	0.7
DNA repair exonuclease	TON_1421	-	F	-		-	F	-
chromosome segregation protein	TON_1422	Y	Y	Y		Y	Y	Y
5'-3' Nuclease	TON_1423	-	F	-		-	F	-
HAM1-like protein	TON_1616	Y	Y	Y		Y	Y	Y
DNA repair and recombination protein RadA	TON_1647	1.95	1.3	1.22		1	0.97	0.97
DNA helicase	TON_1882	-	-	0.52		-	-	0.08
Hypothetical exonuclease SbcD	TON_1921	-	F	-		-	F	-
Endonuclease IV	TON_1961	C	F	-		C	F	-
DNA degradation and restriction
Hypothetical DNA methylase	TON_1221	-	F	-		-	F	-
Type II restriction enzyme AccI	TON_1382	-	F	-		-	F	-
Transcription and regulatory function
RNA polymerase
DNA-directed RNA polymerase subunit D	TON_0105	Y	0.9	1.28		Y	0.38	0.82
DNA-directed RNA polymerase subunit B	TON_0217	1.03	0.71	0.74		0.54	0.03	0.05
DNA-directed RNA polymerase subunit A'	TON_0218	1.05	0.84	0.81		0.58	0.31	0.27
DNA-directed RNA polymerase subunit A''	TON_0219	C	-	S		C	-	S
DNA-directed RNA polymerase, subunit F	TON_0407	C	-	-		C	-	-
Transcription factors
Transcription elongation factor NusA-like protein	TON_0221	0.8	Y	0.76		0.39	Y	0.26
Transcription elongation factor NusA-like protein	TON_0342	0.76	0.79	0.66		0.35	0.39	0.26
Elongation factor 1-alpha	TON_0752	1.21	1.16	1.22		1	1	1
Elongation factor EF-2	TON_0755	1.21	0.84	1.26		1	0	1
Transcription factor	TON_1309	-	F	S		-	F	S
Transcription regulators
Transcription regulator, PadR-like family	TON_0114	-	F	-		-	F	-
Hypothetical transcription regulator	TON_0318	-	-	S		-	-	S
Hypothetical transcription regulator	TON_0332	0.76	0.81	0.54		0	0	0
Hypothetical transcription regulator	TON_0523	Y	0.26	Y		Y	0.01	Y
Transcription regulator	TON_0525	0.79	0.36	Y		0.31	0	Y
Hypothetical transcription regulator	TON_0662	-	F	-		-	F	-
Transcription regulator	TON_1284	-	F	S		-	F	S
Hypothetical transcription regulator	TON_1342	1.32	1.22	Y		0.76	0.66	Y
Hypothetical transcription regulator	TON_1373	Y	0.3	0.55		Y	0	0.2
Transcription regulator	TON_1393	-	-	S		-	-	S
Hypothetical transcription regulator	TON_1436	-	-	S		-	-	S
Transcription regulator	TON_1510	0.39	0.29	0.54		0	0	0.02
Transcription regulator	TON_1663	-	-	S		-	-	S
Hypothetical transcription regulator	TON_1797	0.82	0.73	0.44		0.35	0.19	0
Manganese-dependent transcription regulator	TON_1956	-	-	S		-	-	S
Hypothetical transcription regulator	TON_1976	1.79	Y	1.4		0.89	Y	0.78
Others
Probable bis(5'-adenosyl)-triphosphatase, HIT family	TON_0025	C	-	-		C	-	-
Hypothetical regulator of amino acid metabolism	TON_0499	0.57	0.54	0.7		0.05	0.05	0.21
Putative ATPase RIL (Rnase L inhibitor homolog)	TON_0727	C	-	-		C	-	-
proteasome-activating nucleotidase	TON_1385	Y	Y	Y		Y	Y	Y
Hypothetical phosphate transport system regulator PhoU	TON_1464	1.34	1.2	1.46		0.97	0.88	0.99
Hypothetical phosphate transport system regulator PhoU	TON_1551	Y	0.44	Y		Y	0.04	Y
Translation
Ribosomal proteins - large subunit
50S ribosomal protein L10e	TON_0063	0.93	1.79	1.32		0.42	0.94	0.78
50S ribosomal protein L3P	TON_0066	1.17	1.57	1.45		0.92	1	1
50S ribosomal protein L4P	TON_0067	1.23	1.72	1.28		1	1	1
50S ribosomal protein L23	TON_0068	Y	1.52	1.23		Y	0.85	0.79
50S ribosomal protein L2P	TON_0069	1.6	1.58	1.63		0.93	0.91	0.87
50S ribosomal protein L22P	TON_0071	1.19	Y	1.52		0.62	Y	0.99
50S ribosomal protein L14P	TON_0076	1.08	Y	1.48		0.56	Y	0.9
50S ribosomal protein L24P	TON_0077	1.4	1.75	Y		0.86	0.89	Y
50S ribosomal protein L5P	TON_0079	1.28	1.73	1.6		0.83	0.99	0.99
50S ribosomal protein L6P	TON_0082	1.14	1.32	1.51		0.85	0.98	1
50S ribosomal protein L19e	TON_0084	1.12	Y	Y		0.6	Y	Y
50S ribosomal protein L18P	TON_0085	1.28	1.21	1.31		0.99	0.95	1
50S ribosomal protein L30P	TON_0087	1.46	1.62	1.51		1	1	0.98
50S ribosomal protein L15P	TON_0088	1.32	2.16	1.68		0.9	1	0.99
50S ribosomal protein L14e	TON_0094	1.43	1.92	1.75		1	0.99	0.99
50S ribosomal protein L18e	TON_0106	1.14	1.28	1.36		0.74	0.95	0.91
50S ribosomal protein L13P	TON_0107	1.14	1.08	1.48		0.67	0.54	0.69
50S ribosomal protein L1P	TON_0180	1.36	-	1.38		0.88	-	0.82
Acidic ribosomal protein P0	TON_0181	1.15	1.55	1.42		0.98	1	1
50S ribosomal protein L30e	TON_0220	-	F	S		-	F	S
50S ribosomal protein L21e	TON_0406	1.39	Y	2.23		0.85	Y	0.97
50S ribosomal protein L7Ae	TON_0954	1.34	1.63	2.01		1	1	1
50S ribosomal protein LX	TON_1106	0.92	1.27	Y		0.39	0.8	Y
50S ribosomal protein L31e	TON_1108	1.06	Y	2.1		0.65	Y	0.99
Ribosomal proteins - small subunit
30S ribosomal protein S19P	TON_0070	Y	Y	Y		Y	Y	Y
30S ribosomal protein S3P	TON_0072	1.16	1.45	1.09		0.82	1	0.71
30S ribosomal protein S17P	TON_0075	1.21	1.12	1.21		0.76	0.7	0.73
30S ribosomal protein S4e	TON_0078	1.09	1.46	1.23		0.84	1	0.97
30S ribosomal protein S8P	TON_0081	-	F	-		-	F	-
30S ribosomal protein S5P	TON_0086	1.11	1.34	1.26		0.82	0.98	0.99
30S ribosomal protein S13P	TON_0102	1.23	1.32	1.45		0.94	0.8	0.98
30S ribosomal protein S4	TON_0103	1.21	1.6	1.21		0.9	1	0.92
30S ribosomal protein S11P	TON_0104	1.23	1.35	1.23		0.89	1	0.92
30S ribosomal protein S9P	TON_0108	1.21	1.21	1.21		0.89	0.86	0.9
30S ribosomal protein S2	TON_0112	0.91	1.14	1.2		0.21	0.84	0.89
30S ribosomal protein S12P	TON_0222	1.02	1.67	1.27		0.52	0.98	0.96
30S ribosomal protein S7P	TON_0223	0.95	1.12	1.03		0.47	0.74	0.59
30S ribosomal protein S8e	TON_0354	1.3	Y	1.26		0.86	Y	0.78
30S ribosomal protein S3Ae	TON_0520	1.12	1.26	1.06		0.69	0.86	0.6
30S ribosomal protein S10P	TON_0751	C	-	S		C	-	S
30S ribosomal protein S28e	TON_0953	C	-	S		C	-	S
30S ribosomal protein S19e	TON_1103	1.12	1	1.08		0.75	0.57	0.67
30S ribosomal protein S24e	TON_1910	0.95	1.82	Y		0.4	0.98	Y
30S ribosomal protein S6e	TON_1945	1.15	1.57	1.32		0.73	0.9	0.78
tRNA aminoacylation
asparagine synthetase A	TON_0058	Y	Y	Y		Y	Y	Y
Leucyl-tRNA synthetase	TON_0141	Y	Y	1.26		Y	Y	0.78
Glutamyl-tRNA synthetase	TON_0189	1.2	1.06	1.31		0.74	0.61	0.85
Putative RNA-associated protein	TON_0028	-	F	-		-	F	-
Aspartyl-tRNA synthetase	TON_0343	C	-	S		C	-	S
Threonyl-tRNA synthetase	TON_0376	0.78	0.73	0.73		0.02	0.01	0
Phenylalanyl-tRNA synthetase subunit beta	TON_0395	1.31	1.05	1.13		0.82	0.52	0.7
Phenylalanyl-tRNA synthetase subunit alpha	TON_0396	0.75	0.63	1.68		0	0	1
Glutamyl-tRNA(Gln) amidotransferase subunit E	TON_0402	1.52	0.94	1		0.95	0.38	0.47
Glutamyl-tRNA(Gln) amidotransferase subunit D	TON_0403	1.28	1.32	1.22		0.82	0.91	0.83
Arginyl-tRNA synthetase	TON_0505	Y	0.73	Y		Y	0.27	Y
Prolyl-tRNA synthetase	TON_0568	1.97	1.11	1.46		1	0.67	0.94
Methionyl-tRNA synthetase	TON_0579	1.05	0.9	1.23		0.53	0.33	0.8
Cysteinyl-tRNA synthetase	TON_0602	0.96	0.69	0.86		0.46	0.04	0.22
Glycyl-tRNA synthetase	TON_0643	0.86	1.03	1.28		0.11	0.61	0.96
alanyl-tRNA synthetase-related protein	TON_0899	Y	Y	Y		Y	Y	Y
Asparaginyl-tRNA synthetase	TON_0961	0.76	0.7	0.79		0.08	0.04	0.14
Tyrosyl-tRNA synthetase	TON_0981	1.13	0.93	1.14		0.77	0.34	0.81
Seryl-tRNA synthetase	TON_1090	1.52	0.78	1.86		1	0.06	1
Lysyl-tRNA synthetase	TON_1397	C	-	-		C	-	-
Tryptophanyl-tRNA synthetase	TON_1666	C	F	-		C	F	-
Histidyl-tRNA synthetase	TON_1722	-	-	0.38		-	-	0.19
Alanyl-tRNA synthetase	TON_1729	1.26	Y	1.45		0.73	Y	0.81
Isoleucyl-tRNA synthetase	TON_1803	1.82	1.51	2.8		1	0.99	1
tRNA/rRNA modification and processing
Exosome complex RNA-binding protein Rrp4	TON_0029	0.83	0.52	0.64		0.25	0	0.05
Exosome complex exonuclease Rrp41	TON_0030	0.69	0.54	0.77		0.19	0.03	0.29
Exosome complex RNA-binding protein Rrp42	TON_0031	0.86	0.7	-		0.27	0.13	-
Cleavage and polyadenylation specficity factor subunit-like protein	TON_0165	-	-	S		-	-	S
SnoRNP component	TON_1299	-	-	S		-	-	S
Dimethyladenosine transferase	TON_0409	-	F	-		-	F	-
Translation factors
Translation initiation factor IF-2 subunit beta	TON_0042	0.8	-	0.84		0.34	-	0.37
Translation initiation factor IF-2 subunit alpha	TON_0237	0.73	0.83	0.52		0.25	0.3	0.01
RNA-binding protein	TON_0405	-	-	S		-	-	S
Translation initiation factor IF-5A	TON_0426	0.98	0.96	0.68		0.41	0.37	0.01
Translation initiation factor IF-1A	TON_0767	-	F	-		-	F	-
Translation initiation factor IF-2B subunit beta	TON_0934	0.9	0.96	1.04		0.3	0.43	0.57
Translation initiation factor IF-2	TON_0948	1.19	1.34	1.3		0.78	0.93	0.87
Translation initiation factor IF-2B subunit delta	TON_1296	1.3	1.63	0.91		1	1	0.16
elongation factor 1-beta	TON_1866	Y	Y	Y		Y	Y	Y
Translation initiation factor IF-2 subunit gamma	TON_1944	1.31	1.09	1.31		0.99	0.79	1
Helicases with unknown function
large helicase-related protein	TON_0613	Y	Y	Y		Y	Y	Y
N(2),N(2)-dimethylguanosine tRNA methyltransferase	TON_0648	C	-	-		C	-	-
23S rRNA (uracil-5-)-methyltransferase	TON_0947	-	-	S		-	-	S
Fibrillarin	TON_1300	1.25	-	0.43		0.62	-	0.01
Hypothetical tRNA/rRNA methyltransferase	TON_1783	C	-	-		C	-	-
2'-5' RNA ligase	TON_1813	Y	1.21	1.46		Y	0.62	0.68
Cellular process
Cell division
Hypothetical cell division control protein	TON_0043	-	F	-		-	F	-
Cell division protein FtsZ	TON_0176	0.9	1.07	0.84		0.04	0.81	0
ATPase involved in chromosome partitioning	TON_0262	0.78	0.53	0.47		0.07	0	0
Chromosome partitioning protein	TON_0620	2.77	2.32	1.67		0.95	0.98	0.92
DNA polymerase sliding clamp (PCNA homolog)	TON_0826	1.09	0.96	0.8		0.71	0.41	0.09
ATPase, N-terminus	TON_0915	Y	Y	Y		Y	Y	Y
Chromosome segregation ATPase	TON_1072	C	F	S		C	F	S
Hypothetical CDC48/VCP (homolog, AAA superfamilly)	TON_1094	-	F	S		-	F	S
Cell division protein FtsZ	TON_1256	C	F	-		C	F	-
Cell division GTPase	TON_1670	-	-	S		-	-	S
Cell motility
archaeal flagella-related protein C (FlaC)	TON_1184	Y	Y	Y		Y	Y	Y
Methyl-accepting chemotaxis protein	TON_1202	-	F	S		-	F	S
Nucleotide metabolism
Purines
Adenine phosphoribosyltransferase	TON_0120	-	F	-		-	F	-
GMP synthase subunit B	TON_1893	-	F	S		-	F	S
GMP synthase subunit A	TON_1894	C	-	-		C	-	-
Hypothetical protein TON_0163	TON_0163	-	F	-		-	F	-
Pyrimidines
CTP synthetase	TON_0352	0.27	0.3	0.27		0.01	0.01	0.01
Aspartate carbamoyltransferase catalytic subunit	TON_1437	-	-	S		-	-	S
Orotate phosphoribosyltransferase	TON_1513	C	-	-		C	-	-
Thioredoxin reductase	TON_1603	Y	6.17	0.5		Y	1	0
2-Deoxyribonucleotide metabolism
Hypothetical ribonucleotide reductase alpha subunit	TON_1816	1.84	1.28	1.23		1	0.98	1
Anaerobic ribonucleoside-triphosphate reductase activating enzyme	TON_1871	C	-	-		C	-	-
Nucleotide and nucleoside interconversions
Adenylate kinase	TON_0090	Y	Y	0.91		Y	Y	0.42
Cytidylate kinase	TON_0093	C	-	-		C	-	-
Adenylate kinase	TON_0780	-	-	S		-	-	S
Nucleoside diphosphate kinase	TON_0951	1.11	1.36	1.2		0.76	0.96	0.92
Uridylate kinase	TON_1270	Y	1.26	0.93		Y	0.64	0.42
Hypothetical protein TON_1344	TON_1344	-	-	S		-	-	S
Purine and pyrimidine salvage
5'-Methylthioadenosine phosphorylase	TON_0128	Y	0.95	0.74		Y	0.36	0.05
Uridine phosphorylase	TON_0131	1.55	1.49	0.72		0.99	0.98	0
Uracil phosphoribosyltransferase	TON_0314	-	F	S		-	F	S
Hypoxanthine/guanine phosphoribosyltransferase	TON_0601	1.19	0.74	0.57		0.85	0.01	0
Thymidine phosphorylase	TON_1062	0.82	0.8	1.82		0.01	0	1
5'-Methylthioadenosine phosphorylase II	TON_1651	-	F	S		-	F	S
xanthine/guanine phosphoribosyltransferase	TON_1815	Y	Y	Y		Y	Y	Y
Cofactor and Prosthetic group metabolism
Molybdopterin
Molybdenum cofactor biosynthesis protein B	TON_0690	Y	0.85	0.57		Y	0.39	0.01
Molybdenum cofactor biosynthesis protein MoeA	TON_0691	Y	0.93	0.65		Y	0.37	0.01
Cmo tungsten-containing aldehyde ferredoxin oxidoreductase cofactor modifying protein	TON_1353	Y	1.34	Y		Y	0.73	Y
Molybdenum cofactor biosynthesis protein MoeA	TON_1091	2.01	0.87	1.22		1	0.09	0.93
Molybdenum cofactor biosynthesis protein A (MoeA)	TON_1410	-	F	S		-	F	S
Pantothenate and CoA TK0153 ATP
bifunctional phosphopantothenoylcysteine decarboxylase/phosphopantothenate synthase [Thermococcus onnurineus NA1]	TON_0798	Y	Y	Y		Y	Y	Y
Pyridine nucleotide
Nicotinate phosphoribosyltransferase (Nicotinate-nucleotide pyrophosphorylase (nadC)	TON_1362	1.97	1.03	1.08		0.98	0.49	0.58
NAD synthetase	TON_1770	Y	Y	Y		Y	Y	Y
Nicotinamidase-like amidase	TON_1968	-	F	-		-	F	-
Cobalamine salvage
Cobalamin biosynthesis protein	TON_1875	C	-	-		C	-	-
Hypothetical protein TON_0688	TON_0688	0.64	0.61	0.65		0	0	0
Pyridoxine
Pyridoxal biosynthesis lyase PdxS	TON_1890	Y	Y	2.46		Y	Y	0.96
Thiamine
Thiamine monophosphate kinase	TON_0419	-	-	S		-	-	S
Porphyrin and chlorophyll metabolism
Cobalamin biosynthesis protein	TON_1875	C	-	-		C	-	-
Magnesium chelatase, ChlI subunit	TON_1876	Y	Y	Y		Y	Y	Y
Others
Cysteine desulfurase	TON_0289	C	F	S		C	F	S
Dihydropteroate synthase	TON_0386	1.02	0.68	0.75		0.49	0.04	0.12
3-Octaprenyl-4-hydroxybenzoate decarboxylyase	TON_0392	1.15	0.83	0.96		0.68	0.33	0.41
ABC-type transport system involved in Fe-S cluster assembly, ATPase component	TON_0530	Y	0.92	0.85		Y	0.4	0.41
ABC-type transport system involved in Fe-S cluster assembly, permease component	TON_0531	0.74	0.84	Y		0.27	0.35	Y
Coenzyme F420 hydrogenase alpha subunit	TON_1559	-	F	S		-	F	S
Coenzyme F420 hydrogenase/dehydrogenase beta subunit	TON_1561	-	F	S		-	F	S
Central intermediary metabolism
Polysaccharide degradation
Hypothetical alpha-amylase	TON_0153	C	-	S		C	-	S
Maltodextrin phosphorylase	TON_0191	-	0.98	0.11		-	0.51	0
4-Alpha-Glucanotransferase	TON_1716	-	-	S		-	-	S
Pullulanase (Amylopullulanase, Apu, T. gammatolerans EJ3)	TON_1792	C	-	S		C	-	S
Compatible solute
2-Phosphoglycerate kinase	TON_0742	-	F	-		-	F	-
Bifunctional inositol-1 monophosphatase/fructose-1,6-bisphosphatase	TON_1045	-	-	S		-	-	S
Myo-inositol-1-phosphate synthase	TON_1249	2.16	1.86	6.55		1	1	1
Others
Glycerophosphoryl diester phosphodiesterase	TON_0200	C	-	-		C	-	-
Fructose-bisphosphate aldolase	TON_0903	0.73	0.38	0.04		0.17	0	0
Nucleotidyltransferase (Glucose-1-phosphate thymidylyltransferase [Thermococcus sibiricus MM 739])	TON_1842	2.86	Y	1.99		0.99	Y	0.99
RfbB dTDP-glucose 4,6-dehydratase (dTDP-glucose 4,6-dehydratase [Pyrococcus abyssi GE5])	TON_1843	2.34	Y	1.86		0.99	Y	1
Amino acid metabolism
Tryptophan and phenylalanine metabolism
tryptophan synthase subunit beta	TON_0147	Y	Y	Y		Y	Y	Y
Phenylalanyl-tRNA synthetase subunit beta	TON_0395	1.31	1.05	1.13		0.82	0.52	0.7
Phenylalanyl-tRNA synthetase subunit alpha	TON_0396	0.75	0.63	1.68		0	0	1
arginine acid proline metabolism
ArgE/DapE-related deacylase	TON_1462	1.73	1.02	Y		0.99	0.51	Y
Aspartate metabolism
Aspartate aminotransferase	TON_0565	0.71	0.63	Y		0.05	0.02	Y
hypothetical aspartate racemase	TON_0801	Y	Y	Y		Y	Y	Y
L-asparaginase	TON_1392	Y	Y	Y		Y	Y	Y
Aspartate carbamoyltransferase catalytic subunit	TON_1437	-	-	S		-	-	S
Glutamate metaboiism
gltB-1 glutamate synthase small chain	TON_0057	Y	Y	Y		Y	Y	Y
Glutamate dehydrogenase (GDH)	TON_0157	0.73	0.75	1.93		0	0	1
Ornithine carbamoyltransferase	TON_0435	0.9	1.13	1.9		0.23	0.85	1
Putative glutamate synthase subunit beta	TON_0542	C	-	-		C	-	-
putative glutamate synthase subunit beta	TON_0702	Y	Y	1.46		Y	Y	0.68
Glucosamine--fructose-6-phosphate aminotransferase	TON_0774	0.99	0.65	1.02		0.43	0	0.58
Proline dehydrogenase, alpha subunit	TON_1265	0.38	0.49	Y		0.08	0.16	Y
Putative oxidoreductase	TON_1376	C	-	-		C	-	-
4-Aminobutyrate aminotransferase (Pyridoxal phosphate-dependent aminotransferase, class III family [T. gammatolerans EJ3])	TON_1605	Y	4.35	14.15		Y	1	1
GlnA glutamine synthetase	TON_1772	C	-	S		C	-	S
Histidine metabolism
Hypothetical Imidazolonepropionase-like amidohydrolase	TON_0704	2.77	4.22	1.97		1	1	1
Imidazoleglycerol-phosphate dehydratase	TON_0881	C	-	-		C	-	-
1-(5-Phosphoribosyl)-5-[(5-phosphoribosylamino)methylideneamino] imidazole-4-carboxamide isomerase	TON_0883	-	F	-		-	F	-
Imidazole glycerol phosphate synthase subunit HisF	TON_0884	-	-	S		-	-	S
Histidinol-phosphate aminotransferase	TON_0886	-	-	S		-	-	S
Histidyl-tRNA synthetase	TON_1722	-	-	0.38		-	-	0.19
Serine metabolism
Probable serine-glyoxylate aminotransferase, class V	TON_0061	2.56	2.01	3.71		1	1	1
Serine hydroxymethyltransferase	TON_0821	2.08	2.92	2.23		1	1	1
Cysteine synthase	TON_1004	-	-	S		-	-	S
Sarcosine oxidase, beta subunit	TON_1281	C	-	-		C	-	-
sarcosine oxidase, alpha subunit	TON_1282	Y	Y	Y		Y	Y	Y
Glycine cleavage system protein H	TON_1334	2.23	Y	Y		0.97	Y	Y
D-3-phosphoglycerate dehydrogenase	TON_1463	1.48	1.28	1.25		1	1	0.99
Tyrosine metabolism
Fe-containing alcohol dehydrogenase	TON_0936	1.32	1.34	1.51		0.96	0.79	1
Tyrosyl-tRNA synthetase	TON_0981	1.13	0.93	1.14		0.77	0.34	0.81
Hypothetical protein TON_1701	TON_1701	C	F	S		C	F	S
Lysine metabolism
Multiple substrate aminotransferase	TON_1295	0.21	0.38	0.46		0	0	0
Lysyl-tRNA synthetase	TON_1397	C	-	-		C	-	-
Diaminopimelate aminotransferase (Succinyl-diaminopimelate desuccinylase [Thermococcus kodakarensis KOD1])	TON_1785	2.2	1.32	Y		0.97	0.87	Y
Glycine and Thereonine metabolism
Glycine dehydrogenase subunit 1	TON_0213	1.43	1.93	1.43		0.94	1	0.95
Glycine dehydrogenase subunit 2	TON_0214	1.63	1.86	1.82		1	1	1
L-Threonine 3-dehydrogenase	TON_0397	1.2	1.34	1.3		1	1	1
D-isomer specific 2-hydroxyacid dehydrogenase	TON_0569	1.77	1.72	1.34		0.99	1	0.92
Hypothetical threonine synthase (TS)	TON_1232	-	F	-		-	F	-
2-Amino-3-ketobutyrate coenzyme A ligase (2-amino-3-oxobutanoate synthase (glycine C-acetyltransferase) [T. gammatolerans EJ3])	TON_1415	0.83	0.81	2.08		0	0	1
Glycine cleavage system aminomethyltransferase T	TON_1494	1.34	1.36	1.55		0.93	0.92	0.99
Methionine metabolism
S-Adenosylmethionine synthetase	TON_0560	1.07	0.93	1.04		0.81	0.11	0.76
Methionyl-tRNA synthetase	TON_0579	1.05	0.9	1.23		0.53	0.33	0.8
S-adenosyl-L-homocysteine hydrolase	TON_1212	Y	1.4	Y		Y	0.8	Y
5'-Methylthioadenosine phosphorylase II (Methylthioadenosine phosphorylase (mtaP) [Thermococcus gammatolerans EJ3])	TON_1651	-	F	S		-	F	S
Valine, leucine and isoleucine metabolism
Leucyl-tRNA synthetase	TON_0141	Y	Y	1.26		Y	Y	0.78
Isoleucyl-tRNA synthetase	TON_1803	1.82	1.51	2.8		1	0.99	1
Selenoamino acid metabolism
Sulfate adenylyltransferase	TON_1707	0.39	Y	Y		0.16	Y	Y
General function prediction only
Acetyltransferase
N-acetyltransferase	TON_0874	C	-	S		C	-	S
N-acetyltransferase	TON_1305	-	-	S		-	-	S
Hypothetical acetyltransferase	TON_0372	Y	Y	0.91		Y	Y	0.5
ATPases, GTPases, and ATP/GTP-binding proteins
Predicetd ATPase	TON_0059	C	F	S		C	F	S
Predicted GTPase	TON_0356	C	-	-		C	-	-
ATPase	TON_0612	-	F	-		-	F	-
translation-associated GTPase	TON_0666	Y	Y	Y		Y	Y	Y
ATPase C-terminus	TON_0916	Y	Y	Y		Y	Y	Y
Hypothetical ATP-binding protein	TON_1019	C	-	-		C	-	-
ATPase	TON_1059	0.62	0.73	0.54		0.08	0.21	0.03
ATPase	TON_1080	-	-	S		-	-	S
ATPase	TON_1081	-	-	S		-	-	S
Hypothetical ATPase	TON_1105	Y	2.36	Y		Y	0.84	Y
ATPase	TON_1483	4.9	4.06	1.14		1	1	0.96
Hypothetical ATPase	TON_1600	Y	1.07	Y		Y	0.51	Y
ATPase	TON_1779	0.59	0.57	0.51		0	0	0
Hydrolases
Predicted Hydrolase	TON_0002	-	F	S		-	F	S
Hydrolase	TON_0136	C	-	-		C	-	-
hydrolase	TON_0197	Y	Y	Y		Y	Y	Y
hydrolase	TON_0817	Y	Y	Y		Y	Y	Y
Putative RNA-associated protein	TON_0028	-	F	-		-	F	-
Exosome complex RNA-binding protein Rrp4	TON_0029	0.83	0.52	0.64		0.25	0	0.05
Metallophosphoesterase	TON_0045	-	F	-		-	F	-
Amino acid kinase	TON_0134	0.7	0.58	0.85		0.36	0.29	0.43
Metal-dependent phosphohydrolase	TON_0341	-	-	S		-	-	S
phosphohydrolase	TON_0421	Y	Y	Y		Y	Y	Y
Metal-dependent phosphohydrolase	TON_0696	C	-	S		C	-	S
Hypothetical Imidazolonepropionase-like amidohydrolase	TON_0704	2.77	4.22	1.97		1	1	1
Metallophosphoesterase	TON_0741	-	F	S		-	F	S
Metal-dependent amidohydrolase	TON_0960	C	F	-		C	F	-
Metallophosphoesterase	TON_0987	1.25	1.03	0.74		0.84	0.45	0.03
Metal-dependent hydrolase	TON_1314	1.32	0.83	0.5		0.98	0.06	0
Hydrolase	TON_1406	C	-	-		C	-	-
ArgE/DapE-related deacylase	TON_1462	1.73	1.02	Y		0.99	0.51	Y
Metallophosphoesterase	TON_1553	C	-	-		C	-	-
Carbon-nitrogen hydrolase	TON_1923	C	-	S		C	-	S
DNA/RNA-binding proteins
RNA-binding protein	TON_0405	-	-	S		-	-	S
RNA-binding protein FAU-1	TON_1408	Y	0.92	Y		Y	0.43	Y
RNA-binding protein	TON_1505	1.08	0.77	0.87		0.55	0.23	0.34
DNA-binding protein	TON_0559	-	-	S		-	-	S
DNA/RNA-binding protein albA	TON_0930	1.12	1.22	1.57		0.87	0.99	1
RNA-binding protein FAU-1	TON_1408	Y	0.92	Y		Y	0.43	Y
RNA-binding protein	TON_1505	1.08	0.77	0.87		0.55	0.23	0.34
Nucleotidyltransferases
Nucleotidyltransferase	TON_1842	2.86	Y	1.99		0.99	Y	0.99
Methyltransferase
UbiE ubiquinone/menaquinone biosynthesis methyltransferase	TON_1509	C	-	-		C	-	-
SAM-dependent methyltransferase	TON_1925	-	-	S		-	-	S
Others
Hypothetical glutamine amidotransferase	TON_0739	Y	Y	0.73		Y	Y	0.4
GHMP kinase	TON_1516	C	-	-		C	-	-
Hypothetical YjeF-ralted carbohydrate kinase	TON_1659	Y	0.98	1.45		Y	0.5	0.74
Carbohydrate/pyrimidine kinase	TON_1686	C	-	-		C	-	-
Hypothetical glutamine amidotransferase	TON_1973	Y	Y	Y		Y	Y	Y
Unknown function
Phosphomannomutase-related protein	TON_0195	-	-	S		-	-	S
RNA terminal phosphate cyclase	TON_0714	1.11	1.08	0.66		0.7	0.63	0.02
Hypothetical proteins
Hypothetical protein TON_0033	TON_0033	0.99	0.84	1.32		0.52	0.21	0.77
Hypothetical protein, conserved, containing ZPR1 zinc-finger domain	TON_0034	C	-	-		C	-	-
Hypothetical protein, conserved, containing CBS domains	TON_0037	C	F	S		C	F	S
Hypothetical cell division control protein	TON_0043	-	F	-		-	F	-
Hypothetical protein TON_0111	TON_0111	1.07	0.92	0.9		0.54	0.35	0.32
Hypothetical protein TON_0117	TON_0117	C	F	S		C	F	S
Hypothetical protein TON_0130	TON_0130	C	-	-		C	-	-
Hypothetical protein TON_0142	TON_0142	-	F	-		-	F	-
Hypothetical alpha-amylase	TON_0153	C	-	S		C	-	S
Hypothetical protein TON_0163	TON_0163	-	F	-		-	F	-
Hypothetical protein TON_0239	TON_0239	C	F	S		C	F	S
Hypothetical protein TON_0253	TON_0253	0.53	0.57	0.91		0	0.01	0.34
Hypothetical protein TON_0303	TON_0303	-	F	-		-	F	-
Hypothetical transcription regulator	TON_0318	-	-	S		-	-	S
Hypothetical protein TON_0323	TON_0323	-	-	S		-	-	S
Hypothetical transcription regulator	TON_0332	0.76	0.81	0.54		0	0	0
hypothetical membrane protein, conserved	TON_0344	Y	Y	Y		Y	Y	Y
Hypothetical protein TON_0361	TON_0361	0.52	0.49	0.73		0	0	0
Hypothetical protein TON_0365	TON_0365	-	F	-		-	F	-
Hypothetical AP endonuclease	TON_0382	0.92	0.7	0.76		0.43	0.11	0.1
Hypothetical protein TON_0384	TON_0384	-	-	S		-	-	S
Hypothetical protein TON_0408	TON_0408	-	F	S		-	F	S
Hypothetical protein TON_0414	TON_0414	1.92	-	1.73		0.83	-	0.72
hypothetical protein TON_0432	TON_0432	Y	Y	Y		Y	Y	Y
hypothetical protein TON_0433	TON_0433	Y	Y	Y		Y	Y	Y
Hypothetical protein TON_0445	TON_0445	1.6	Y	Y		0.72	Y	Y
hypothetical protein TON_0474	TON_0474	Y	Y	1.45		Y	Y	0.66
Hypothetical protein TON_0479	TON_0479	Y	Y	0.68		Y	Y	0
Hypothetical carbohydrate-binding protein	TON_0480	Y	Y	1.22		Y	Y	0.85
Hypothetical regulator of amino acid metabolism	TON_0499	0.57	0.54	0.7		0.05	0.05	0.21
Hypothetical protein TON_0514	TON_0514	C	F	-		C	F	-
Hypothetical transcription regulator	TON_0523	Y	0.26	Y		Y	0.01	Y
Hypothetical protein TON_0528	TON_0528	0.84	0.56	0.66		0.23	0	0
Hypothetical vitamin B12 transport protein precursor	TON_0546	Y	Y	1.08		Y	Y	0.52
Hypothetical endoglucanase	TON_0570	1.38	1.17	1.15		0.93	0.72	0.72
Hypothetical protein TON_0618	TON_0618	-	F	-		-	F	-
hypothetical protein TON_0619	TON_0619	Y	Y	Y		Y	Y	Y
Hypothetical protein TON_0625	TON_0625	C	-	S		C	-	S
Hypothetical transcription regulator	TON_0662	-	F	-		-	F	-
Hypothetical protein TON_0670	TON_0670	-	F	-		-	F	-
Hypothetical protein TON_0674	TON_0674	0.24	0.57	0.33		0	0	0
Hypothetical protein TON_0688	TON_0688	0.64	0.61	0.65		0	0	0
Hypothetical Imidazolonepropionase-like amidohydrolase	TON_0704	2.77	4.22	1.97		1	1	1
Hypothetical glutamine amidotransferase	TON_0739	Y	Y	0.73		Y	Y	0.4
Hypothetical protein TON_0781	TON_0781	-	-	S		-	-	S
Hypothetical peroxiredoxin, bacterioferritin comigratory protein	TON_0786	2.61	0.58	0.53		1	0	0
Hypothetical protein TON_0844	TON_0844	-	-	S		-	-	S
Hypothetical protein TON_0849	TON_0849	4.26	2.29	0.37		1	1	0
Hypothetical protein TON_0850	TON_0850	Y	Y	0.38		Y	Y	0
Hypothetical ATP-dependent transporter	TON_0851	4.66	1.84	0.2		1	1	0
Hypothetical rsgA	TON_0852	0.5	0.66	0.29		0	0.17	0
hypothetical protein TON_0869	TON_0869	Y	Y	Y		Y	Y	Y
Hypothetical protein TON_0877	TON_0877	C	-	-		C	-	-
Hypothetical protein TON_0892	TON_0892	-	-	S		-	-	S
hypothetical protein TON_0893	TON_0893	Y	Y	Y		Y	Y	Y
Hypothetical protein TON_0895	TON_0895	-	F	-		-	F	-
Hypothetical protein TON_0928	TON_0928	-	F	-		-	F	-
Hypothetical protein TON_0932	TON_0932	-	F	-		-	F	-
Hypothetical membrane protease subunit	TON_0958	-	-	S		-	-	S
Hypothetical protein TON_1014	TON_1014	1.22	1.36	1.45		0.78	0.84	0.96
Hypothetical ATP-binding protein	TON_1019	C	-	-		C	-	-
Hypothetical protein TON_1048	TON_1048	C	F	S		C	F	S
Hypothetical membrane protease subunit	TON_1058	0.49	0.9	0.3		0	0.38	0
Hypothetical methylmalony-CoA mutase	TON_1076	-	F	-		-	F	-
Hypothetical protein TON_1088	TON_1088	1.21	0.84	1.01		0.82	0.19	0.51
Hypothetical CDC48/VCP	TON_1094	-	F	S		-	F	S
Hypothetical ATPase	TON_1105	Y	2.36	Y		Y	0.84	Y
Hypothetical protein TON_1144	TON_1144	-	-	S		-	-	S
hypothetical protein TON_1149	TON_1149	Y	Y	Y		Y	Y	Y
Hypothetical protein TON_1152	TON_1152	-	F	-		-	F	-
Hypothetical membrane protein, conserved	TON_1177	C	-	-		C	-	-
hypothetical protein TON_1208	TON_1208	0.57	Y	Y		0.29	Y	Y
Hypothetical protein TON_1210	TON_1210	-	F	S		-	F	S
Hypothetical DNA methylase	TON_1221	-	F	-		-	F	-
Hypothetical threonine synthase (TS)	TON_1232	-	F	-		-	F	-
Hypothetical UPF0069 protein	TON_1269	Y	1.06	Y		Y	0.48	Y
hypothetical protein TON_1277	TON_1277	Y	Y	Y		Y	Y	Y
Hypothetical stress-inducible protein	TON_1292	-	F	-		-	F	-
Hypothetical protein TON_1301	TON_1301	0.66	0.95	1.25		0	0.25	1
Hypothetical protein TON_1303	TON_1303	1.07	1.09	1.62		0.64	0.65	0.98
Hypothetical protein TON_1317	TON_1317	-	-	3.56		-	-	0.9
hypothetical protein TON_1335	TON_1335	Y	Y	Y		Y	Y	Y
Hypothetical transcription regulator	TON_1342	1.32	1.22	Y		0.76	0.66	Y
Hypothetical protein TON_1344	TON_1344	-	-	S		-	-	S
Hypothetical protein TON_1357	TON_1357	-	F	-		-	F	-
Hypothetical protein TON_1358	TON_1358	0.53	0.37	0.42		0	0	0
Hypothetical protein TON_1360	TON_1360	-	-	0.88		-	-	0.44
Hypothetical transcription regulator	TON_1373	Y	0.3	0.55		Y	0	0.2
Hypothetical protein TON_1374	TON_1374	-	-	S		-	-	S
Hypothetical protein TON_1389	TON_1389	Y	Y	0.89		Y	Y	0.45
Hypothetical protein TON_1400	TON_1400	-	-	S		-	-	S
Hypothetical protein TON_1432	TON_1432	1.97	Y	3.86		1	Y	1
Hypothetical transcription regulator	TON_1436	-	-	S		-	-	S
Hypothetical protein TON_1439	TON_1439	-	-	S		-	-	S
Hypothetical protein TON_1449	TON_1449	1.49	1.26	1.88		0.93	0.87	0.99
Hypothetical protein TON_1455	TON_1455	-	-	S		-	-	S
Hypothetical phosphate transport system regulator PhoU	TON_1464	1.34	1.2	1.46		0.97	0.88	0.99
Hypothetical membrane protein, conserved	TON_1468	-	F	-		-	F	-
hypothetical protein TON_1485	TON_1485	Y	Y	Y		Y	Y	Y
Hypothetical protein TON_1489	TON_1489	-	-	S		-	-	S
Hypothetical oxidoreductase	TON_1501	Y	1.28	1.28		Y	0.66	0.69
Hypothetical protein TON_1504	TON_1504	0.66	0.41	0.53		0.18	0.03	0.09
Hypothetical protein TON_1506	TON_1506	-	F	-		-	F	-
Hypothetical protein TON_1520	TON_1520	0.52	0.38	0.22		0.01	0	0
Hypothetical protein TON_1531	TON_1531	-	-	S		-	-	S
Hypothetical regulatory protein AsnC	TON_1546	1.8	1.93	Y		1	0.99	Y
Hypothetical phosphate transport system regulator PhoU	TON_1551	Y	0.44	Y		Y	0.04	Y
Hypothetical protein TON_1554	TON_1554	C	-	-		C	-	-
Hypothetical protein TON_1572	TON_1572	-	F	-		-	F	-
hypothetical protein TON_1610	TON_1610	Y	Y	Y		Y	Y	Y
Hypothetical protein TON_1617	TON_1617	2.16	1.12	1.65		1	0.78	1
Hypothetical protein TON_1627	TON_1627	-	-	S		-	-	S
hypothetical protein TON_1637	TON_1637	Y	Y	Y		Y	Y	Y
Hypothetical protein TON_1645	TON_1645	0.66	0.36	-		0.25	0	-
Hypothetical YjeF-ralted carbohydrate kinase	TON_1659	Y	0.98	1.45		Y	0.5	0.74
Hypothetical protein TON_1680	TON_1680	Y	0.96	1.28		Y	0.47	0.63
hypothetical protein TON_1683	TON_1683	Y	Y	Y		Y	Y	Y
Hypothetical protein TON_1691	TON_1691	C	-	-		C	-	-
Hypothetical protein TON_1701	TON_1701	C	F	S		C	F	S
Hypothetical protein TON_1706	TON_1706	-	F	-		-	F	-
Hypothetical protein TON_1737	TON_1737	C	-	-		C	-	-
Hypothetical protein TON_1780	TON_1780	-	-	S		-	-	S
Hypothetical tRNA/rRNA methyltransferase	TON_1783	C	-	-		C	-	-
Hypothetical transcription regulator	TON_1797	0.82	0.73	0.44		0.35	0.19	0
Hypothetical protein TON_1809	TON_1809	C	F	-		C	F	-
Hypothetical protein TON_1811	TON_1811	-	F	S		-	F	S
Hypothetical ribonucleotide reductase alpha subunit	TON_1816	1.84	1.28	1.23		1	0.98	1
hypothetical protein TON_1830	TON_1830	Y	Y	Y		Y	Y	Y
Hypothetical vitamin B12 transport protein precursor	TON_1872	C	F	S		C	F	S
Hypothetical protein TON_1904	TON_1904	C	-	-		C	-	-
Hypothetical exonuclease SbcD	TON_1921	-	F	-		-	F	-
Hypothetical protein TON_1933	TON_1933	-	-	S		-	-	S
Hypothetical protein TON_1947	TON_1947	C	F	-		C	F	-
Hypothetical protein TON_1964	TON_1964	C	-	-		C	-	-
Hypothetical transcription regulator	TON_1976	1.79	Y	1.4		0.89	Y	0.78
aRatio measured by MSE methods.
bp values calculated from individual peak intensities derived from all tryptic peptides detected per protein (see “Experimental Section”).
-, none detected in this experiment.
